# Supplementary material
Source: Springer Nature journal article supplement (https://www.springermedizin.de/resource/supplementary/12931_2013_1419_MOESM3_ESM.pdf/9425954)
Supplement: MOESM3 [file 9425954]

**Total citations from database search**

**n=1,181**

Medline (n=582)

Cochrane (n=599)

**Studies identified through additional searches and reference lists**

**n=5**

**Duplicate citations removed**

**n=120**

**Title and abstract review**

**n=1,066**

**Excluded**

**n=950**

**Full text review**

**n=116**

**Excluded n=108**

- Descriptive studies (n=45)
- Reviews (n=23)
- Letter/editorial/commentaries (n=17)
- Trial protocols (n=8)
- COPD outcome not reported separately (n=8)
- Not intervention (n=2)
- Measurement studies (n=2)
- Abstract (n=1)
- Provider adherence (not patient related) (n=1)
- Not COPD (n=1)

**Included in review**

**n=7**

Studies reported in 8 papers
